# Supplementary material
Source: PubMed Central journal article supplement (PMC4922526)
Supplement: DS_10.1177_1941738116653711.pdf [file DS_10.1177_1941738116653711.pdf]

Appendix.

**Table 2. Rehabilitation Protocol for Non-operative Management of Athletic Pubalgia (with/without Corticosteroid Injection)**

| In-Season                                                                                                                                                                                                                                                                                                                                                                                                                                                             | Week                   | Post-Season                                                                                                                                                                                                                                                                                                                                                                                                                                                           |
|-----------------------------------------------------------------------------------------------------------------------------------------------------------------------------------------------------------------------------------------------------------------------------------------------------------------------------------------------------------------------------------------------------------------------------------------------------------------------|------------------------|-----------------------------------------------------------------------------------------------------------------------------------------------------------------------------------------------------------------------------------------------------------------------------------------------------------------------------------------------------------------------------------------------------------------------------------------------------------------------|
| <ul style="list-style-type: none"> <li>Rest (injected) structures</li> </ul>                                                                                                                                                                                                                                                                                                                                                                                          | <p><b>Week 1-2</b></p> | <ul style="list-style-type: none"> <li>Rest (injected) structures</li> </ul>                                                                                                                                                                                                                                                                                                                                                                                          |
| <ul style="list-style-type: none"> <li>Range of motion lumbar and bilateral hip joints</li> <li>Gluteal muscle and anterior pelvic stabilization:               <ul style="list-style-type: none"> <li>Hip Hikes</li> <li>Abdominal bracing in hook lying</li> <li>Front and side planks</li> <li>Quadruped alternating upper and lower</li> <li>Extremity on compliant and non-compliant surfaces</li> </ul> </li> <li>Stationary bike without resistance</li> </ul> | <p><b>Week 3</b></p>   | <ul style="list-style-type: none"> <li>Range of motion lumbar and bilateral hip joints</li> <li>Gluteal muscle and anterior pelvic stabilization:               <ul style="list-style-type: none"> <li>Hip Hikes</li> <li>Abdominal bracing in hook lying</li> <li>Front and side planks</li> <li>Quadruped alternating upper and lower</li> <li>Extremity on compliant and non-compliant surfaces</li> </ul> </li> <li>Stationary bike without resistance</li> </ul> |
| <ul style="list-style-type: none"> <li>Continue week 3 exercises</li> <li>Flexion only straight leg raises; progress to multiplane</li> <li>Supine hip extension with knee at 0 and 90 degrees</li> <li>Single leg balance exercises</li> <li>Bridging</li> <li>Wall squats at 45 and 90 degrees</li> </ul>                                                                                                                                                           | <p><b>Week 4</b></p>   | <ul style="list-style-type: none"> <li>Continue week 3 exercises</li> <li>Flexion only straight leg raises; progress to multiplane</li> <li>Supine hip extension with knee at 0 and 90 degrees</li> <li>Single leg balance exercises</li> <li>Bridging</li> <li>Wall squats at 45 and 90 degrees</li> </ul>                                                                                                                                                           |
| <ul style="list-style-type: none"> <li>Resistance walking, pushing, pulling</li> <li>Return to running/jumping program (single plane)</li> <li>Box jumps</li> <li>Tilt board, agility ladder and BOSU drills</li> </ul>                                                                                                                                                                                                                                               | <p><b>Week 5</b></p>   | <ul style="list-style-type: none"> <li>Continue weeks 3-4 exercises</li> </ul>                                                                                                                                                                                                                                                                                                                                                                                        |
| <ul style="list-style-type: none"> <li>Progress core stabilization exercises</li> <li>Increase resistive exercise as tolerated</li> <li>Initiate sport specific exercise program</li> </ul>                                                                                                                                                                                                                                                                           | <p><b>Week 6</b></p>   | <ul style="list-style-type: none"> <li>Continue weeks 3-4 exercises</li> </ul>                                                                                                                                                                                                                                                                                                                                                                                        |

---

Table 3. Rehabilitation protocol after surgical repair of athletic pubalgia, Phase I

---

**Day 1 through Week 2: Rest, tendinous healing, and remodeling**

Goals:

- Protect surgical site
- Wound care
- Pain control
- Edema reduction
- Improve soft tissue flexibility
- Restore normal passive hip range of motion
- Educate patient on precautions, restrictions, and plan of care

Rehabilitation:

- Gentle passive ROM to bilateral hip joints; avoid painful end-ranges and excessive hip abduction and extension, which stress the surgical sites
- Joint mobilization of the lumbar spine grade II-III for pain control and lumbar mobility
  - Hip anterior glide mobilization in supine
  - Hip posterior glide mobilization in supine
  - Central lumbar mobilization
  - Anterior ilium rotation mobilization
  - Posterior ilium rotation mobilization
- Soft tissue mobilization of lumbar paraspinal muscles
- Scar mobilization as soon as incision sutures are removed; deep transverse friction massage, instrument-assisted soft tissue mobilization
- Stationary bike without resistance, avoid trunk hyperextension
- Patient education for pelvic neutral in sitting and standing
- Restore normal walking gait patterns
- Avoid activities which increase intra-abdominal pressure
- No lifting or other activities that increase abdominal pressures
- Ice 15 minutes every 2-4 hours for the first 24-48 hours

---

ROM, range of motion.

---

Table 4. Rehabilitation protocol after surgical repair of athletic pubalgia, Phase II

---

**Week 3-4: Continue to increase hip ROM, core strength, improve biomechanics**

Goals:

- Target strengthening and neuromuscular reeducation with a focus on timing and recruitment patterns during functional movements
- Identify muscle imbalances, postural deviations, and muscular compensations
- Advance core strength and stability
- Advance cardiovascular training

Rehabilitation: Monitor patient pain levels and progress as tolerated

- Stretching to increase and restore flexibility of all lower extremity muscle groups including hamstrings, adductors, gluteal muscles, hip flexors, ankle dorsiflexors,

and quadriceps

- Core strengthening/core stability exercises with emphasis on gluteus medius, gluteus maximus, transversus abdominis (TA), and multifidus
  - Isometric abdominals with focus on TA and obliques to facilitate TA recruitment; start in supine and progress to quadruped, kneeling and half-kneeling positions
  - Dead bugs
  - Glute bridges progressing to glute bridges with resistance bands
  - Front and side planks
  - Double -and single-leg bridging
  - Rocker board drills
- Progressive resistive exercises
  - Straight-leg raises for hip flexors
  - Wall squats for hamstrings and quadriceps
  - Heel raises for gastroc/soleus
  - Lateral band walks for hip abductors; maintain lumbar neutral control
  - PNF diagonals with sport cord
  - Cross-band core work initiated in supine and progressed to standing
- Straight plane motion in weightbearing
  - Forward lunges (avoid deep lunges)
  - Single-leg dead lifts
  - Leg presses
  - Wall slides at less than 90 degrees progressing to 90 degrees while extending hold times
  - Step ups and step downs; focus on eccentric quad control and proper pelvic alignment
- Proprioceptive training
  - Single-leg balance exercise to include cone taps, single-leg ball toss
  - Exercises on unstable, noncompliant surfaces such as foam pads, tilt board, BOSU ball
  - Balance reach exercises with both lower and upper extremities
  - Single- and multi-plane wobble board drills
- Cardiovascular training
  - Continue with seated or recumbent bike adding resistance in pain free intensities; seated recruits gluteals more than the recumbent bike
  - Elliptical (pain free)
  - Stable surface or treadmill walking

---

PNF, proprioceptive neuromuscular facilitation; ROM, range of motion.

---

**Table 5.** Rehabilitation protocol after surgical repair of athletic pubalgia, Phase III

---

**Week 5-8: Return to sports/plyometric exercises**

Goals:

- Prescribe sport specific movements and speeds to prepare and strengthen the involved tissue

for the forced couples created during sport-specific movements

- Progress to running on uneven surfaces progressing to an intensity required for specific sport
- Return to full play without pain

Rehabilitation: Exercise in all 3 planes of motion. Implement return to running and sports-specific activities in both open and closed kinetic chain. Monitor patient pain levels and progress as tolerated.

- Core strengthening/core stability exercises
  - 3-way planks
  - Prone physioball walkouts
  - Dynamic planks
  - Resisted core exercise utilizing medicine balls, sports cords, weights
  - Advanced cross-band resisted core exercises
- Triplane weightbearing exercises
  - Forward and lateral lunges
  - TRX/Rip 60 double- and single-leg squats
  - Resisted band ambulation forward, backward, and lateral
  - Speed skaters progressing to resisted speed skaters
  - Slide board drills
- Proprioceptive training
  - Sport cord arcs
  - Sport forward and backward shuffles
  - Single leg ladder drills
  - Single leg BOSU drills
- Cardiovascular training
  - Return to running on even, flat ground
  - Line jumps/box jumps
  - Progress to running on uneven surfaces progressing to an intensity required for specific sport
  - Sport-specific sprinting, endurance running, changes in direction
  - Ladder drills
  - High knees, butt kicks, bounding, high skipping, bear crawls
- Plyometric exercises
  - BOSU drills
  - Box jumps
  - Medicine ball tosses/lunges
  - Weighted rope drills
  - Cone drills
- Agility drills
  - Straight running at a steady pace, 20-30 minutes
  - High-knee drills
  - Lateral running in crouched position
  - Backward running
  - Vertical jumping
  - Stair climbing

- o Carioca drills
    - o Line touch drills
    - o Figure-eight running
    - o Run and cut
  - Sport-specific drills to include:
    - o Court sports: vertical leaping, box out drills, initiate plant/pivot, change direction, stop/start
    - o Soccer: cone dribbling, initiate plant/pivot, change directions, stop/start, increase training/sprinting
    - o Hockey: slide board drills with and without stick, initiate start/stop, skating practice drills with team, shooting
    - o Football: plant/pivot, change directions, short sprints, long sprints, lateral bounds, squat jumps, cross-over drills
-
